# Supplementary material for: Puzzle—Logic Grid Puzzles
Source: Atypon-hosted journal article supplement (doi:10.1287/ited.2014.0129), 2014-09-01
Supplement: ited.2014.0129-sm [file ited.2014.0129-sm%2Flogicgrid.xlsx]

## Sheet: Sheet1
			1	2	3	4	5			1	2	3	4	5			1	2	3	4	5
	1							0							0							0		0	#N/A	#N/A	#N/A
	2							0							0							0		0	#N/A	#N/A	#N/A
	3							0							0							0		0	#N/A	#N/A	#N/A
	4							0							0							0		0	#N/A	#N/A	#N/A
	5							0							0							0		0	#N/A	#N/A	#N/A
			0	0	0	0	0			0	0	0	0	0			0	0	0	0	0
			0	0	0	0	0			0	0	0	0	0			0	0	0	0	0
