# Supplementary material for: Puzzle—Logic Grid Puzzles
Source: Atypon-hosted journal article supplement (doi:10.1287/ited.2014.0129), 2014-09-01
Supplement: ited.2014.0129-sm [file ited.2014.0129-sm%2Fstudies.xlsx]

## Sheet: Sheet1
			1	2	3	4	5			1	2	3	4	5			1	2	3	4	5
			Beasley	Johnson	Lucas	Mason	Tompkins			Business	Economics	History	Mathematics	Physics			Cardiff	Manchester	Oxford	Reading	York
	1	Arthur	1	0	0	0	0	1		0	0	0	0	1	1		0	0	0	0	1	1		Arthur	Beasley	Physics	York
	2	Michael	0	0	0	0	1	1		0	0	0	1	0	1		0	0	0	1	0	1		Michael	Tompkins	Mathematics	Reading
	3	Patricia	0	0	0	1	0	1		1	0	0	0	0	1		0	1	0	0	0	1		Patricia	Mason	Business	Manchester
	4	Richard	0	0	1	0	0	1		0	0	1	0	0	1		1	0	0	0	0	1		Richard	Lucas	History	Cardiff
	5	Veronica	0	1	0	0	0	1		0	1	0	0	0	1		0	0	1	0	0	1		Veronica	Johnson	Economics	Oxford
			1	1	1	1	1			1	1	1	1	1			1	1	1	1	1
			1	5	4	3	2			3	5	4	2	1			4	3	5	2	1
		1. Michael Tompkins studies mathematics.
		x[2,5] = 1	1	=	1
		y[2,4] = 1	1	=	1
		2. Patricia does not study history or physics.
		y[3,3] = 0	0	=	0
		y[3,5] = 0	0	=	0
		3. Johnson does not study physics.
		x[1,1] + y[1,5] <= 1	1	<=	1
		x[2,1] + y[2,5] <= 1	0	<=	1
		x[3,1] + y[3,5] <= 1	0	<=	1
		x[4,1] + y[4,5] <= 1	0	<=	1
		x[5,1] + y[5,5] <= 1	1	<=	1
		4. Lucas is at Cardiff.
		Σi*x[i,3] = Σi*z[i,3]	4	=	4
		5. Either economics or physics is studied at Oxford
														5. Either economics or physics is studied at Oxford
		y[1,2] + y[1,5] >= z[1,3]	1	>=	0
		y[2,2] + y[2,5] >= z[2,3]	0	>=	0
		y[3,2] + y[3,5] >= z[3,3]	0	>=	0
		y[4,2] + y[4,5] >= z[4,3]	0	>=	0
		y[5,2] + y[5,5] >= z[5,3]	1	>=	1									epso{i in M}: y[i,2] + y[i,5] >= z[i,3];
		6. Arthur is not Lucas.
		x[1,3] = 0	0	=	0
		7. The student at Reading does not study physics.
		y[1,1] + z[1,4] <= 1	1	<=	1
		y[2,1] + z[2,4] <= 1	1	<=	1
		y[3,1] + z[3,4] <= 1	0	<=	1
		y[4,1] + z[4,4] <= 1	0	<=	1
		y[5,1] + z[5,4] <= 1	0	<=	1
		8. Of Johnson and Beasley, one studies economics and the other is at York.
		x[1,1] + x[1,2] = y[1,2] + z[1,5]	1	=	1
		x[2,1] + x[2,2] = y[2,2] + z[2,5]	0	=	0
		x[3,1] + x[3,2] = y[3,2] + z[3,5]	0	=	0
		x[4,1] + x[4,2] = y[4,2] + z[4,5]	0	=	0
		x[5,1] + x[5,2] = y[5,2] + z[5,5]	1	=	1
		9. Of Veronica and Mason, one is at Oxford and the other studies Business.
		x[5,4]+y[5,1]+z[5,3] = 1	1	=	1
		y[1,1]+z[1,3] = x[1,4]	0	=	0
		y[2,1]+z[2,3] = x[2,4]	0	=	0
		y[3,1]+z[3,3] = x[3,4]	1	=	1
		y[4,1]+z[4,3] = x[4,4]	0	=	0
		10. Of the mathematics and physics students, one is at York and the other is at Reading.
		y[1,4] + y[1,5] = z[1,4] + z[1,5]	1	=	1
		y[2,4] + y[2,5] = z[2,4] + z[2,5]	1	=	1
		y[3,4] + y[3,5] = z[3,4] + z[3,5]	0	=	0
		y[4,4] + y[4,5] = z[4,4] + z[4,5]	0	=	0
		y[5,4] + y[5,5] = z[5,4] + z[5,5]	0	=	0
